# Supplementary material for: Environmental exposures to endocrine disrupting chemicals (EDCs) and their role in endometriosis: a systematic literature review
Source: publisher site journal article supplement (doi:10.1515/reveh-2020-0046), 2020-09-09
Supplement: Supplementary file 1 [file j_reveh-2020-0046_suppl.pdf]

## SUPPLEMENTAL MATERIAL

**Table 1: List of Abbreviations**

| <b>Abbreviation</b> | <b>Full form</b>                              |
|---------------------|-----------------------------------------------|
| BBP                 | butyl benzyl phthalate                        |
| BEHP                | bis (2-ethylhexyl) phthalate                  |
| BHC                 | benzene hexachloride                          |
| BPA                 | bisphenol A                                   |
| CALUX               | chemical activated luciferase gene expression |
| Cd                  | Cadmium                                       |
| DDT                 | dichlorodiphenyltrichloroethane               |
| DEHP                | di (2-ethyl hexyl) phthalate                  |
| DEN                 | deep endometriotic nodules                    |
| DEP                 | diethyl phthalate                             |
| DES                 | Diethylstilbestrol                            |
| DL                  | dioxin like                                   |
| DLC                 | dioxin like compounds                         |
| DMP                 | dimethyl phthalate                            |
| DnBP                | di-n-butyl phthalate                          |
| DnOP                | di-n-octyl phthalate                          |
| EDC                 | endocrine disrupting chemical                 |
| ETAAS               | electrothermal atomic absorption spectrometry |
| GC                  | Gas chromatography                            |
| HCB                 | hexachlorobenzene                             |
| Hg                  | Mercury                                       |
| HPLC                | high performance liquid chromatography        |
| HRMS                | high resolution mass spectrometry             |
| ICP-MS              | inductively coupled plasma mass spectrometry  |
| MS                  | mass spectrometry                             |
| mBP / MBP           | mono-n-butyl phthalate                        |
| mBzP / MBzP         | mono-benzyl phthalate                         |
| mCHP /MCHP          | monocyclohexyl phthalate                      |
| mCMHP /<br>MCMHP    | mono-[(2-carboxymethyl) hexyl] phthalate      |
| mCPP / MCPP         | mono (3-carboxypropyl) phthalate              |

|                  |                                             |
|------------------|---------------------------------------------|
| mECPP /<br>MECPP | mono (2-ethyl-5-carboxyphenyl) phthalate    |
| mEHHP /<br>MEHHP | mono (2-ethyl-5- hydroxyhexyl) phthalate    |
| mEHP /<br>MEHP   | mono (2-ethylhexyl) phthalate               |
| mEOHP /<br>MEOHP | mono (2-ethyl-5-oxohexyl) phthalate         |
| mEP / MEP        | monoethyl phthalate                         |
| miBP             | mono (2-isobutyl) phthalate                 |
| mNP              | monoisonoyl phthalate                       |
| mOP /MOP         | monooctyl phthalate                         |
| MRI              | magnetic resonance imaging                  |
| MT               | metallothioneins                            |
| Ni               | Nickel                                      |
| OCEP             | organochlorinated environmental pollutant   |
| OCP              | organochlorinated pesticides                |
| OHAT             | Office of Health Assessment and Translation |
| OR               | Odds ratio                                  |
| Pb               | Lead                                        |
| PBB              | Polybrominated-biphenyl                     |
| PBDE             | Polybrominated-diphenyl-ether               |
| PCB              | polychlorinated biphenyl                    |
| PCDD             | polychlorinated dibenzo dioxins             |
| PCDF             | polychlorinated dibenzo furans              |
| PE               | phthalate ester                             |
| POP              | Persistent organochlorine pollutants        |
| p-p'-DDE         | 1-1-dichloro-2,2-bis 4-chlorophenyl ethene  |
| t-nonachlor      | Trans-nonachlor                             |
| TCDD             | 2,3,7,8 tetrachloro dibenzo-p-dioxin        |
| TEF              | toxic equivalent factor                     |
| TEQ              | toxic equivalent quotient                   |
| TMS              | tandem mass spectrometry                    |
| WHO              | World Health Organization                   |
| UNEP             | United Nations Environmental Program        |

|        |                         |
|--------|-------------------------|
| USG    | ultrasonography         |
| 95% CI | 95% confidence interval |

| Table 2: PRISMA-P (Preferred Reporting Items for Systematic review and Meta-Analysis Protocols) 2015 checklist: recommended items to address in a systematic review protocol |         |                                                                                                                                           |                                                                                                                                                                                                                                                                                                                                                                                                                                                                                                                                                                                                                                                                                                                   |
|------------------------------------------------------------------------------------------------------------------------------------------------------------------------------|---------|-------------------------------------------------------------------------------------------------------------------------------------------|-------------------------------------------------------------------------------------------------------------------------------------------------------------------------------------------------------------------------------------------------------------------------------------------------------------------------------------------------------------------------------------------------------------------------------------------------------------------------------------------------------------------------------------------------------------------------------------------------------------------------------------------------------------------------------------------------------------------|
| Section and topic                                                                                                                                                            | Item No | Checklist item                                                                                                                            | Comments                                                                                                                                                                                                                                                                                                                                                                                                                                                                                                                                                                                                                                                                                                          |
| <b>ADMINISTRATIVE INFORMATION</b>                                                                                                                                            |         |                                                                                                                                           |                                                                                                                                                                                                                                                                                                                                                                                                                                                                                                                                                                                                                                                                                                                   |
| Title:                                                                                                                                                                       |         |                                                                                                                                           |                                                                                                                                                                                                                                                                                                                                                                                                                                                                                                                                                                                                                                                                                                                   |
| Identification                                                                                                                                                               | 1a      | Identify the report as a protocol of a systematic review                                                                                  | The PRISMA guidelines were used to conduct the systematic review.                                                                                                                                                                                                                                                                                                                                                                                                                                                                                                                                                                                                                                                 |
| Update                                                                                                                                                                       | 1b      | If the protocol is for an update of a previous systematic review, identify as such                                                        | Not applicable                                                                                                                                                                                                                                                                                                                                                                                                                                                                                                                                                                                                                                                                                                    |
| Registration                                                                                                                                                                 | 2       | If registered, provide the name of the registry (such as PROSPERO) and registration number                                                | Not applicable                                                                                                                                                                                                                                                                                                                                                                                                                                                                                                                                                                                                                                                                                                    |
| Authors:                                                                                                                                                                     |         |                                                                                                                                           |                                                                                                                                                                                                                                                                                                                                                                                                                                                                                                                                                                                                                                                                                                                   |
| Contact                                                                                                                                                                      | 3a      | Provide name, institutional affiliation, e-mail address of all protocol authors; provide physical mailing address of corresponding author | <p>Dr. Diksha Sirohi, School of Public Health, Faculty of Medicine, The University of Queensland (<a href="mailto:d.sirohi@uqconnect.edu.au">d.sirohi@uqconnect.edu.au</a>);</p> <p>Dr. Ruqaiya AL Ramadhani, School of Public Health, Faculty of Medicine, The University of Queensland (<a href="mailto:r.aramadhani@uq.net.au">r.aramadhani@uq.net.au</a>);</p> <p>Dr. Luke D. Knibbs, School of Public Health, Faculty of Medicine, The University of Queensland, (<a href="mailto:l.knibbs@uq.edu.au">l.knibbs@uq.edu.au</a>)</p> <p>Physical mailing address of corresponding author: Dr. Diksha Sirohi, School of Public Health, Faculty of Medicine, The University of Queensland, Herston QLD - 4006</p> |
| Contributions                                                                                                                                                                | 3b      | Describe contributions of protocol authors and identify the guarantor of the review                                                       | Not applicable                                                                                                                                                                                                                                                                                                                                                                                                                                                                                                                                                                                                                                                                                                    |

|                           |    |                                                                                                                                                                                                                               |                                                                                                                                                                                                                                                    |
|---------------------------|----|-------------------------------------------------------------------------------------------------------------------------------------------------------------------------------------------------------------------------------|----------------------------------------------------------------------------------------------------------------------------------------------------------------------------------------------------------------------------------------------------|
| Amendments                | 4  | If the protocol represents an amendment of a previously completed or published protocol, identify as such and list changes; otherwise, state plan for documenting important protocol amendments                               | Not applicable                                                                                                                                                                                                                                     |
| Support:                  |    |                                                                                                                                                                                                                               |                                                                                                                                                                                                                                                    |
| Sources                   | 5a | Indicate sources of financial or other support for the review                                                                                                                                                                 | Not applicable                                                                                                                                                                                                                                     |
| Sponsor                   | 5b | Provide name for the review funder and/or sponsor                                                                                                                                                                             | Not applicable                                                                                                                                                                                                                                     |
| Role of sponsor or funder | 5c | Describe roles of funder(s), sponsor(s), and/or institution(s), if any, in developing the protocol                                                                                                                            | Not applicable                                                                                                                                                                                                                                     |
| <b>INTRODUCTION</b>       |    |                                                                                                                                                                                                                               |                                                                                                                                                                                                                                                    |
| Rationale                 | 6  | Describe the rationale for the review in the context of what is already known                                                                                                                                                 | Rationale for the review is addressed in the main manuscript on pages 5 and 6 in the Introduction section.                                                                                                                                         |
| Objectives                | 7  | Provide an explicit statement of the question(s) the review will address with reference to participants, interventions, comparators, and outcomes (PICO)                                                                      | The PICO statement is explicitly described in the main manuscript on pages 6 and 7 under Search Strategy and Data Sources in the Materials and Methods section.                                                                                    |
| <b>METHODS</b>            |    |                                                                                                                                                                                                                               |                                                                                                                                                                                                                                                    |
| Eligibility criteria      | 8  | Specify the study characteristics (such as PICO, study design, setting, time frame) and report characteristics (such as years considered, language, publication status) to be used as criteria for eligibility for the review | The PICO statement is described in the main manuscript on pages 6 and 7 under Search Strategy and Data Sources in the Material and Methods section. The inclusion criteria are described on pages 7 and 8 under the Material and Methods sections. |
| Information sources       | 9  | Describe all intended information sources (such as electronic databases, contact with study authors, trial registers or other grey literature sources) with planned dates of coverage                                         | Three electronic databases (PubMed, EMBASE and Scopus) were searched up to 2 July, 2018.                                                                                                                                                           |
| Search strategy           | 10 | Present draft of search strategy to be used for at least one electronic database, including planned limits, such that it could be repeated                                                                                    | Details of the search strategy are described in Table-3 of the Supplemental Materials.                                                                                                                                                             |

|                             |     |                                                                                                                                                                                                 |                                                                                                                                                                                                                                                                                                                         |
|-----------------------------|-----|-------------------------------------------------------------------------------------------------------------------------------------------------------------------------------------------------|-------------------------------------------------------------------------------------------------------------------------------------------------------------------------------------------------------------------------------------------------------------------------------------------------------------------------|
| Study records:              |     |                                                                                                                                                                                                 |                                                                                                                                                                                                                                                                                                                         |
| Data management             | 11a | Describe the mechanism(s) that will be used to manage records and data throughout the review                                                                                                    | The flow-chart showing the selection of studies is mapped out on page 10 of the main manuscript. The details on data management is described on page 11 of the main manuscript under the Result and Discussion section.                                                                                                 |
| Selection process           | 11b | State the process that will be used for selecting studies (such as two independent reviewers) through each phase of the review (that is, screening, eligibility and inclusion in meta-analysis) | Two reviewers will conduct the search of the databases independently and will apply the eligibility criteria independently to arrive at the final number of studies to be included in the review. Findings will be discussed and discrepancies will be resolved through mutual consensus.                               |
| Data collection process     | 11c | Describe planned method of extracting data from reports (such as piloting forms, done independently, in duplicate), any processes for obtaining and confirming data from investigators          | The data extraction process is described on page 11 in the main manuscript under the Results and Discussion section. Table-7 in the Supplemental Materials provides the summary of studies included in the review.                                                                                                      |
| Data items                  | 12  | List and define all variables for which data will be sought (such as PICO items, funding sources), any pre-planned data assumptions and simplifications                                         | Data is sought for population (cases, operative or population cohort), exposure to different types of EDCs (BPA, PE, metals and trace elements, dioxins and DLC, organochlorinated environmental pollutants, PCB), controls (controls) and outcome (endometriosis). This systematic review did not receive any funding. |
| Outcomes and prioritization | 13  | List and define all outcomes for which data will be sought, including prioritization of main and additional outcomes, with rationale                                                            | Outcome is the diagnosis of endometriosis. Studies in which endometriosis was diagnosed surgically and/or by histopathology or by the means of ultrasonography or magnetic resonance imaging were included in this review. Surgical visualization and histopathology are the gold-standard for diagnosis, while         |

|                                    |     |                                                                                                                                                                                                                                                  |                                                                                                                                                                                                                                                                                                                                                                                                                                                                                   |
|------------------------------------|-----|--------------------------------------------------------------------------------------------------------------------------------------------------------------------------------------------------------------------------------------------------|-----------------------------------------------------------------------------------------------------------------------------------------------------------------------------------------------------------------------------------------------------------------------------------------------------------------------------------------------------------------------------------------------------------------------------------------------------------------------------------|
|                                    |     |                                                                                                                                                                                                                                                  | ultrasonography and magnetic resonance imaging have decent sensitivity in diagnosing endometriosis.                                                                                                                                                                                                                                                                                                                                                                               |
| Risk of bias in individual studies | 14  | Describe anticipated methods for assessing risk of bias of individual studies, including whether this will be done at the outcome or study level, or both; state how this information will be used in data synthesis                             | The Risk of Bias Assessment is described on page 9 in the main manuscript. Table-6 of the Supplemental Materials gives the risk of bias assessment ratings.                                                                                                                                                                                                                                                                                                                       |
| Data synthesis                     | 15a | Describe criteria under which study data will be quantitatively synthesised                                                                                                                                                                      | Not applicable                                                                                                                                                                                                                                                                                                                                                                                                                                                                    |
|                                    | 15b | If data are appropriate for quantitative synthesis, describe planned summary measures, methods of handling data and methods of combining data from studies, including any planned exploration of consistency (such as $I^2$ , Kendall's $\tau$ ) | Not applicable                                                                                                                                                                                                                                                                                                                                                                                                                                                                    |
|                                    | 15c | Describe any proposed additional analyses (such as sensitivity or subgroup analyses, meta-regression)                                                                                                                                            | Not applicable                                                                                                                                                                                                                                                                                                                                                                                                                                                                    |
|                                    | 15d | If quantitative synthesis is not appropriate, describe the type of summary planned                                                                                                                                                               | Effect estimates, 95% confidence interval, and an assessment of confounding variables are used to review the studies.                                                                                                                                                                                                                                                                                                                                                             |
| Meta-bias(es)                      | 16  | Specify any planned assessment of meta-bias(es) (such as publication bias across studies, selective reporting within studies)                                                                                                                    | Not applicable                                                                                                                                                                                                                                                                                                                                                                                                                                                                    |
| Confidence in cumulative evidence  | 17  | Describe how the strength of the body of evidence will be assessed (such as GRADE)                                                                                                                                                               | The quality assessment of individual studies was carried out using the New Castle Ottawa Checklist for case-control and cohort studies. This is described on page 8 of the main manuscript and in Table-4 and Table-5 of the Supplemental Materials. The NTP / OHAT guidelines for Human and Animal Studies was used to evaluate the body of evidence. This is described on page 9 of the main manuscript under Risk of Bias Assessment and in Table-6 of Supplemental Materials. |

**Table 3 - Details of search terms**

| <b>Sr. No</b> | <b>Category</b>    | <b>Search Terms</b>                                                                                                                                                                                                                      |
|---------------|--------------------|------------------------------------------------------------------------------------------------------------------------------------------------------------------------------------------------------------------------------------------|
| 1             | Clinical condition | Endometriosis OR Adenomyosis OR Endometrio* OR Chocolate cyst                                                                                                                                                                            |
| 2             | EDC types          | Endocrine disrupting chemical OR endocrine disruptors OR trace element OR metal OR organochlorine, OR polychlorinated biphenyl OR polybrominated diphenyl ether OR dioxin OR phthalate OR bisphenol A OR OCP OR PCB OR PBB OR EDC OR BPA |
| 3             | Study Design       | cohort OR follow up OR longitudinal OR prospective OR case-control OR study OR studies OR stud*                                                                                                                                          |



**Table 4: QUALITY ASSESSMENT FOR CASE-CONTROL STUDIES**

| Case- Control Study                                                                                                                                     | selection       |                         |                   |                    | comparability   |               | exposure                   |                                  |                   | overall |
|---------------------------------------------------------------------------------------------------------------------------------------------------------|-----------------|-------------------------|-------------------|--------------------|-----------------|---------------|----------------------------|----------------------------------|-------------------|---------|
|                                                                                                                                                         | Case definition | Case representativeness | Control selection | Control definition | Main confounder | Other factors | Ascertain ment of exposure | Same method for case and control | Non-response rate |         |
| 1. Upson et al, <b>A population-based case-control study of urinary bisphenol A concentrations and risk of endometriosis</b>                            | *               | *                       | *                 | *                  | *               | *             | *                          | *                                | *                 | 9       |
| 2. Huang et al, <b>Association between phthalate exposure and glutathione S-transferase M1 polymorphism in adenomyosis, leiomyoma and endometriosis</b> | *               | -                       | -                 | *                  | *               | *             | *                          | *                                | *                 | 7       |
| 3. BS Reddy, <b>Association of phthalate esters with endometriosis in Indian women</b>                                                                  | *               | -                       | -                 | *                  | *               | -             | *                          | *                                | -                 | 5       |

|                                                                                                                                              |   |            |            |   |               |   |   |   |   |   |
|----------------------------------------------------------------------------------------------------------------------------------------------|---|------------|------------|---|---------------|---|---|---|---|---|
| 4. Heilier et al,<br>Assessment of cadmium impregnation in women suffering from endometriosis: a preliminary study                           | * | *          | -          | * | *             | * | * | * | - | 7 |
| 5. Hiroaki Itoh, a case-control study of the association between urinary cadmium concentration and endometriosis in infertile Japanese women | * | -          | -          | - | *             | * | * | * | * | 6 |
| 6. Elena De Felip ,<br>Dioxin-like compounds and endometriosis: a study on Italian and Belgian women of reproductive age                     | * | -          | -          | * | *             | - | * | * | * | 5 |
| 7. Cai LY et al,<br>Dioxins in ascites and serum of women with endometriosis: a pilot study                                                  | * | -          | -          | * | *             | * | * | * | * | 7 |
| 8. Porpora et al,<br>Endometriosis and OCEP: A case control study on Italian women of reproductive age                                       | * | -          | -          | * | *             | * | * | * | * | 7 |
| 9. Silva et al, Elevated levels of whole blood nickel in a group of Sri Lankan women                                                         | * | - hospital | - hospital | * | * age matched | - | * | * | * | 6 |

|                                                                                                                                                           |   |   |   |   |   |   |   |   |   |   |
|-----------------------------------------------------------------------------------------------------------------------------------------------------------|---|---|---|---|---|---|---|---|---|---|
| <b>with endometriosis: a case control study</b>                                                                                                           |   |   |   |   |   |   |   |   |   |   |
| 10. JF Heilier et al, <b>Environmental and host-associated risk factors in endometriosis and deep endometriotic nodules: A matched case-control study</b> | * | - | - | - | - | - | * | * | - | 3 |
| 11. Heilier et al, <b>Cadmium, Lead and Endometriosis</b>                                                                                                 | * | - | - | * | - | - | * | * | * | 5 |
| 12. Roya Rozati et al, <b>Evaluation of the Phthalate Esters in South Indian Women with Endometriosis</b>                                                 | * | - | - | * | * | - | * | * | - | 5 |
| 13. Trabert et al , <b>Non-Dioxin-Like Polychlorinated Biphenyls and Risk of Endometriosis</b>                                                            | * | * | * | * | * | * | * | * | * | 9 |
| 14. Upson et al , <b>Phthalates and risk of endometriosis</b>                                                                                             | * | * | * | * | * | * | * | * | * | 9 |
| 15. Germaine Lebel et al, <b>Organochlorine exposure and risk of endometriosis</b>                                                                        | * | - | - | * | * | * | * | * | * | 7 |
| 16. Niskar AS, <b>Serum Dioxin, Polychlorinated Biphenyls and Endometriosis: A case</b>                                                                   | * | - | - | * | * | * | * | * | * | 7 |

|                                                                                                                                                                    |   |   |   |   |   |   |   |   |   |   |
|--------------------------------------------------------------------------------------------------------------------------------------------------------------------|---|---|---|---|---|---|---|---|---|---|
| <b>control study in Atlanta</b>                                                                                                                                    |   |   |   |   |   |   |   |   |   |   |
| 17. A.Pauwels , <b>The risk of endometriosis and exposure to dioxins and PCB: a case control study of infertile women</b>                                          | * | - | - | * | * | * | * | * | * | 7 |
| 18. Reddy et al, <b>High plasma concentrations of polychlorinated biphenyls and phthalate esters in women with endometriosis: a prospective case control study</b> | * | - | - | * | - | - | * | * | - | 4 |
| 19. Porpora et al, <b>Increased levels of polychlorobiphenyls in Italian women with endometriosis</b>                                                              | * | - | - | * | * | * | * | * | * | 7 |
| 20. Heilier JF et al, <b>Increased dioxin-like compounds in the serum of women with peritoneal endometriosis and deep endometriotic (adenomyotic) nodules</b>      | * | - | - | - | * | * | * | * | * | 6 |

|                                                                                                                                                     |   |   |   |   |   |   |   |   |   |   |
|-----------------------------------------------------------------------------------------------------------------------------------------------------|---|---|---|---|---|---|---|---|---|---|
| 21. MA Martinez et al,<br><b>Increased levels of dioxin-like substances in adipose tissue in patients with deep infiltrating endometriosis</b>      | * | - | - | * | * | * | * | * | * | 7 |
| 22. Simsa et al,<br><b>Increased exposure to dioxin-like compounds is associated with endometriosis in a case-control study in women</b>            | * | - | - | * | * | - | * | * | * | 6 |
| 23. Kim SH et al,<br><b>Increased plasma levels of phthalate ester in women with advanced-stage endometriosis: a prospective case-control study</b> | * | - | - | * | * | * | * | * | * | 7 |
| 24. Schiattarella A et al,<br><b>Plasma and urinary levels of lead and cadmium in patients with endometriosis</b>                                   | * | - | - | * | - | - | * | * | - | 4 |
| 25. Rashidi B.H e al,<br><b>A case-control study of bisphenol A and endometrioma among subgroup of Iranian women</b>                                | * | - | - | - | * | * | * | * | * | 6 |

|                                                                                                                                                                                                                     |   |   |   |   |   |   |   |   |   |   |
|---------------------------------------------------------------------------------------------------------------------------------------------------------------------------------------------------------------------|---|---|---|---|---|---|---|---|---|---|
| 26. Porpora M. G et al,<br><b>Endometriosis and Organochlorinated Environmental Pollutants: A case-control Study on Italian Women of Reproductive Age</b>                                                           | * | - | - | * | * | * | * | * | * | 7 |
| 27. Ploteau S et al,<br><b>Associations between internal exposure levels of persistent organic pollutants in adipose tissue and deep infiltrating endometriosis with or without concurrent ovarian endometrioma</b> | * | - | - | * | * | * | * | * | - | 6 |
| 28. Simonelli A et al,<br><b>Environmental and occupational exposure to bisphenol A and endometriosis: urinary and peritoneal fluid concentration levels</b>                                                        | * | - | - | * | - | - | * | * | * | 5 |

**Table 5: QUALITY ASSESSMENT FOR COHORT STUDIES**

| Cohort Study                                                                                                                                  | Selection                          |                              |                            |                                                           | comparability   |               | outcome               |                                                 |                                  | overall |
|-----------------------------------------------------------------------------------------------------------------------------------------------|------------------------------------|------------------------------|----------------------------|-----------------------------------------------------------|-----------------|---------------|-----------------------|-------------------------------------------------|----------------------------------|---------|
|                                                                                                                                               | Exposed cohort representative ness | non exposed cohort selection | Ascertainm ent of exposure | outcome of interest was not present at the start of study | Main confounder | Other factors | Assessment of outcome | Was follow-up long enough for outcomes to occur | Adequacy of follow up of cohorts |         |
| 1. Louis GM Buck et al, <b>Environmental PCB exposure and risk of endometriosis</b>                                                           | *                                  | *                            | *                          | *                                                         | *               | *             | *                     | -                                               | *                                | 8       |
| 2. Louis GM Buck et al, <b>Bisphenol A and phthalates and endometriosis: the Endometriosis: Natural History, Diagnosis and Outcomes Study</b> | *                                  | *                            | *                          | *                                                         | *               | *             | *                     | -                                               | *                                | 8       |
| 3. Louis GM Buck et al, <b>Persistent Lipophilic Environmental Chemicals and Endometriosis: The ENDO Study</b>                                | *                                  | *                            | *                          | *                                                         | *               | *             | -                     | -                                               | *                                | 7       |
| 4. Pollack AZ et al, <b>Trace elements and endometriosis: The ENDO Study</b>                                                                  | *                                  | *                            | *                          | *                                                         | *               | *             | -                     | -                                               | *                                | 7       |

|                                                                           |   |   |   |   |   |   |   |   |   |   |   |
|---------------------------------------------------------------------------|---|---|---|---|---|---|---|---|---|---|---|
| 5. Cooney MA et al,<br><b>Organochlorine pesticides and endometriosis</b> | * | * | * | * | * | * | * | * | - | - | 7 |
|---------------------------------------------------------------------------|---|---|---|---|---|---|---|---|---|---|---|

| TABLE 6: RISK OF BIAS ASSESSMENT RATINGS                                                                          |                         |                             |                          |                             |                        |                         |                        |                      |                        |                          |                        |                       |                          |                          |                       |
|-------------------------------------------------------------------------------------------------------------------|-------------------------|-----------------------------|--------------------------|-----------------------------|------------------------|-------------------------|------------------------|----------------------|------------------------|--------------------------|------------------------|-----------------------|--------------------------|--------------------------|-----------------------|
| Bias Domains and Questions /<br>Name of the study                                                                 | Upson<br>et al,<br>2014 | Simonel<br>li et al<br>2016 | Rashidi<br>et al<br>2017 | Buck<br>Louis et<br>al 2013 | Upson<br>et al<br>2013 | Rozati<br>et al<br>2008 | Reddy<br>at el<br>2006 | Kim<br>et al<br>2011 | Huang<br>et al<br>2010 | Pollack<br>et al<br>2013 | Silva<br>et al<br>2013 | Itoh<br>et al<br>2008 | Heilier<br>et al<br>2004 | Heilier<br>et al<br>2006 | Pauwels<br>et al 2001 |
| <b>Selection Bias</b>                                                                                             |                         |                             |                          |                             |                        |                         |                        |                      |                        |                          |                        |                       |                          |                          |                       |
| Did selection of study participants<br>result in appropriate comparison<br>groups?                                | (++)                    | (+)                         | (+)                      | (++)                        | (++)                   | (++)                    | (++)                   | (++)                 | (++)                   | (++)                     | (++)                   | (-)                   | (-)                      | NR                       | (-)                   |
| <b>Confounding Bias</b>                                                                                           |                         |                             |                          |                             |                        |                         |                        |                      |                        |                          |                        |                       |                          |                          |                       |
| Did the study design or analysis<br>account for important<br>confounding and modifying<br>variables? (Key Domain) | (+)                     | NR                          | (+)                      | (+)                         | (+)                    | (+)                     | (+)                    | (+)                  | (+)                    | (+)                      | (-)                    | (+)                   | (+)                      | (-)                      | (+)                   |
| <b>Attrition / Exclusion Bias</b>                                                                                 |                         |                             |                          |                             |                        |                         |                        |                      |                        |                          |                        |                       |                          |                          |                       |
| Were outcome data complete<br>without attrition or exclusion<br>from analysis?                                    | (+)                     | (-)                         | (-)                      | (+)                         | (+)                    | (-)                     | (-)                    | (+)                  | (+)                    | (++)                     | (+)                    | (+)                   | (++)                     | NR                       | (+)                   |
| <b>Detection Bias</b>                                                                                             |                         |                             |                          |                             |                        |                         |                        |                      |                        |                          |                        |                       |                          |                          |                       |
| Can we be confident in the<br>exposure characterization? (Key<br>Domain)                                          | (++)                    | (++)                        | (++)                     | (++)                        | (++)                   | (++)                    | (++)                   | (++)                 | (++)                   | (++)                     | (++)                   | (++)                  | (++)                     | (++)                     | (++)                  |
| Can we be confident in the<br>outcome assessment? (Key<br>Domain)                                                 | (++)                    | (++)                        | (+)                      | (++)                        | (++)                   | (++)                    | (++)                   | (++)                 | (++)                   | (+)                      | (++)                   | (++)                  | (--)                     | (+)                      | (+)                   |
| <b>Selective Reporting Bias</b>                                                                                   |                         |                             |                          |                             |                        |                         |                        |                      |                        |                          |                        |                       |                          |                          |                       |
| Were all measured outcomes<br>reported?                                                                           | (++)                    | (++)                        | (++)                     | (++)                        | (++)                   | (++)                    | (++)                   | (++)                 | (++)                   | (++)                     | (++)                   | (++)                  | (++)                     | (++)                     | (++)                  |



| <b>Other Sources of Bias</b>                                                                                                                           |        |        |        |        |        |        |        |        |        |        |        |        |        |        |        |
|--------------------------------------------------------------------------------------------------------------------------------------------------------|--------|--------|--------|--------|--------|--------|--------|--------|--------|--------|--------|--------|--------|--------|--------|
| Were there no other potential threats to internal validity (e.g., statistical methods were appropriate and researchers adhered to the study protocol)? | (+)    | (+)    | (+)    | (+)    | (+)    | (+)    | (+)    | (+)    | (+)    | (++)   | (+)    | (+)    | (+)    | (+)    | (+)    |
| <b>Conflict of Interest</b>                                                                                                                            | (+)    | (+)    | (+)    | (+)    | (+)    | (+)    | (+)    | (+)    | (+)    | (+)    | (+)    | (+)    | (+)    | (+)    | (+)    |
| Summary of Tiered Classification                                                                                                                       | Tier 1 | Tier 2 | Tier 2 | Tier 1 | Tier 1 | Tier 2 | Tier 2 | Tier 1 | Tier 1 | Tier 1 | Tier 2 |

[Key: (++) Definitely low risk of bias, (+) Probably low risk of bias, (-) Probably high risk of bias, (--) Definitely high risk of bias, NR Reasons not recorded]

| TABLE 6 CONTINUED: RISK OF BIAS ASSESSMENT RATINGS                                                       |                   |                     |                  |                    |                |                     |                    |                  |                    |                       |                   |                  |                    |                    |
|----------------------------------------------------------------------------------------------------------|-------------------|---------------------|------------------|--------------------|----------------|---------------------|--------------------|------------------|--------------------|-----------------------|-------------------|------------------|--------------------|--------------------|
| Bias Domains and Questions / Name of the study                                                           | Niskar et al 2009 | Martinez et al 2015 | Simsa et al 2010 | Heilier et al 2005 | Cai et al 2011 | De Felip et al 2004 | Ploteau et al 2017 | Lebel et al 1998 | Porpora et al 2009 | Buck Louis et al 2012 | Cooney et al 2010 | Louis et al 2005 | Trabert et al 2010 | Porpora et al 2006 |
| Selection Bias                                                                                           |                   |                     |                  |                    |                |                     |                    |                  |                    |                       |                   |                  |                    |                    |
| Did selection of study participants result in appropriate comparison groups?                             | NR                | (++)                | NR               | NR                 | NR             | (--)                | (+)                | (+)              | (+)                | (++)                  | NR                | (+)              | (++)               | (NR)               |
| Confounding Bias                                                                                         |                   |                     |                  |                    |                |                     |                    |                  |                    |                       |                   |                  |                    |                    |
| Did the study design or analysis account for important confounding and modifying variables? (Key Domain) | (+)               | (+)                 | (+)              | (+)                | (+)            | (-)                 | (+)                | (+)              | (+)                | (+)                   | (-)               | (+)              | (+)                | (+)                |
| Attrition / Exclusion Bias                                                                               |                   |                     |                  |                    |                |                     |                    |                  |                    |                       |                   |                  |                    |                    |
| Were outcome data complete without attrition or exclusion from analysis?                                 | (+)               | (+)                 | (+)              | (+)                | (+)            | (+)                 | (+)                | (+)              | (+)                | (+)                   | (+)               | (+)              | (+)                | (+)                |
| Detection Bias                                                                                           |                   |                     |                  |                    |                |                     |                    |                  |                    |                       |                   |                  |                    |                    |
| Can we be confident in the exposure characterization? (Key Domain)                                       | (++)              | (++)                | (++)             | (++)               | (++)           | (++)                | (++)               | (++)             | (++)               | (++)                  | (++)              | (++)             | (++)               | (++)               |
| Can we be confident in the outcome assessment? (Key Domain)                                              | NR                | (+)                 | (++)             | (-)                | (+)            | (++)                | (+)                | (+)              | (+)                | (+)                   | (+)               | (+)              | (+)                | (++)               |
| Selective Reporting Bias                                                                                 |                   |                     |                  |                    |                |                     |                    |                  |                    |                       |                   |                  |                    |                    |

|                                                                                                                                                        |               |               |               |               |               |               |               |               |               |               |               |               |               |               |
|--------------------------------------------------------------------------------------------------------------------------------------------------------|---------------|---------------|---------------|---------------|---------------|---------------|---------------|---------------|---------------|---------------|---------------|---------------|---------------|---------------|
| Were all measured outcomes reported?                                                                                                                   | (++)          | (++)          | (++)          | (++)          | (++)          | (++)          | (++)          | (++)          | (++)          | (++)          | (++)          | (++)          | (++)          | (++)          |
| <b>Other Sources of Bias</b>                                                                                                                           |               |               |               |               |               |               |               |               |               |               |               |               |               |               |
| Were there no other potential threats to internal validity (e.g., statistical methods were appropriate and researchers adhered to the study protocol)? | (+)           | (+)           | (+)           | (+)           | (+)           | (-)           | (+)           | (+)           | (+)           | (+)           | (+)           | (+)           | (+)           | (+)           |
| <b>Conflict of Interest</b>                                                                                                                            | (+)           | (++)          | (+)           | (+)           | (+)           | (+)           | (+)           | (+)           | (+)           | (+)           | (+)           | (+)           | (+)           | (+)           |
| Summary of Tiered Classification                                                                                                                       | <b>Tier 2</b> | <b>Tier 1</b> | <b>Tier 1</b> | <b>Tier 2</b> | <b>Tier 2</b> | <b>Tier 2</b> | <b>Tier 1</b> | <b>Tier 1</b> | <b>Tier 1</b> | <b>Tier 1</b> | <b>Tier 2</b> | <b>Tier 1</b> | <b>Tier 1</b> | <b>Tier 2</b> |

[Key: (++) Definitely low risk of bias, (+) Probably low risk of bias, (-) Probably high risk of bias, (--) Definitely high risk of bias, NR Reasons not recorded]

**Table 7: Summary of studies included**

| Study / Reference no.        | Location | Study design                  | N                                                              | Age Mean (+ SD) Or Range                                                                                  | Outcome Assessment                              | Confounders                                                                                                                    | Exposure Assessment |                            |
|------------------------------|----------|-------------------------------|----------------------------------------------------------------|-----------------------------------------------------------------------------------------------------------|-------------------------------------------------|--------------------------------------------------------------------------------------------------------------------------------|---------------------|----------------------------|
|                              |          |                               |                                                                |                                                                                                           |                                                 |                                                                                                                                | Chemical            | Specimen                   |
| Upson et al, 2014 / [13]     | USA      | Population based case control | 144 / 291                                                      | 17–49 years                                                                                               | Ca: Sur<br>Co: MRI                              | Age, reference year, natural logarithm transformed urinary creatinine, education, alcohol consumption, smoking status and race | BPA                 | Urine                      |
| Simonelli et al 2016 / [20]  | Italy    | Case control                  | 60 / 68                                                        | <30 - ≥40 years                                                                                           | Ca: Sur<br>Co: Unclear                          | Not explicitly stated                                                                                                          | BPA                 | Urine and peritoneal fluid |
| Rashidi et al 2017 / [19]    | Iran     | Case control                  | 50 / 50                                                        | Ca: 32.22 +5.34<br>Co: 33.20 +5.46                                                                        | Ca: Sur<br>Co: USG                              | Age, BMI, parity and education                                                                                                 | BPA                 | Urine                      |
| Buck Louis et al 2013 / [21] | USA      | Matched cohort                | Operative Cohort<br>190 / 283<br>Population Cohort<br>14 / 127 | Operative Cohort<br>Ca: 32.0 +6.8<br>Co: 33.6 +7.1<br>Population Cohort<br>Ca: 33.1 +8.3<br>Co: 32.1 +7.8 | Operative Cohort: Sur<br>Population Cohort: MRI | Age, BMI, urinary creatinine                                                                                                   | BPA and PE          | Urine                      |
| Upson et al 2013 / [31]      | USA      | Population based case control | 92 / 195                                                       | 18–49 years                                                                                               | Ca: Sur<br>Co: Unclear                          | Age, reference year, natural logarithm transformed urinary creatinine, education, alcohol consumption and smoking status       | PE                  | Urine                      |
| Rozati et al 2008 / [30]     | India    | Case control                  | 99 / 135                                                       | Ca: 25.6 +4.2<br>Co: 26.4 +4.7                                                                            | Ca; Sur<br>Co: Sur                              | BMI, age at menarche, duration of infertility and clinical symptoms                                                            | PE                  | Blood                      |
| Reddy at el 2006 / [29]      | India    | Case control                  | 49 / 59                                                        | Ca: 26.2 +4.2<br>Co I: 27.4 +4.7<br>Co II: 27.1 +3.4                                                      | Ca: Sur<br>Co: Sur                              | Not explicitly stated                                                                                                          | PE                  | Blood                      |

|                            |           |                          |                                                                |                                                                                                           |                                                         |                                                                                                     |                                              |                                          |
|----------------------------|-----------|--------------------------|----------------------------------------------------------------|-----------------------------------------------------------------------------------------------------------|---------------------------------------------------------|-----------------------------------------------------------------------------------------------------|----------------------------------------------|------------------------------------------|
| Kim et al 2011 / [32]      | Korea     | Prospective case control | 97 / 169                                                       | Ca: 34.8 +0.7<br>Co: 34.9 +0.5                                                                            | Ca: Sur<br>Co: Sur                                      | Number of deliveries, BMI and plasma MEPH levels and DEHP levels                                    | PE                                           | Blood                                    |
| Huang et al 2016 / [28]    | Taiwan    | Case control             | 80 / 29                                                        | Ca:<br>EN: 34.3 +7.5<br>LEI: 41.1 +6.8<br>AD: 43.2 +6.5<br>Co: 36.2 +9.0                                  | Ca: Sur<br>Co: Sur                                      | GSTM1 polymorphism and BMI for EN<br>GSTM1 genotype and age for AD and LEI. Adjusted for creatinine | PE                                           | Urine and serum (peripheral lymphocytes) |
| Pollack et al 2013 / [38]  | USA       | Matched cohort           | Operative Cohort<br>190 / 283<br>Population Cohort<br>14 / 113 | Operative Cohort<br>Ca: 32.0 +6.8<br>Co: 33.6 +7.1<br>Population Cohort<br>Ca: 33.1 +8.3<br>Co: 32.1 +7.8 | Operative Cohort: Sur<br>Population Cohort: MRI         | Age, BMI, smoking site, race, vitamin use and creatinine                                            | Cd, Pb, Hg, and trace elements               | Urine and blood                          |
| Silva et al 2013 / [40]    | Sri-Lanka | Case control             | 50 / 50                                                        | Ca: 33.0 +5.4<br>Co: 32.7 +5.4                                                                            | Ca: Sur<br>Co: Sur                                      | Age                                                                                                 | Cd, Ni, Pb                                   | Blood                                    |
| Itoh et al 2008 / [47]     | Japan     | Case control             | 54 / 74                                                        | 20- 45 years                                                                                              | Ca: Sur<br>Co: Sur                                      | Menstrual regularity, BMI, age at menarche, alcohol consumption and smoking status                  | Cd                                           | Urine                                    |
| Heilier et al 2004 / [46]  | Belgium   | Prospective case control | 59 / 21                                                        | Ca:<br>EN: 30.7 +6.9<br>DEN: 29.7 +6.3<br>Co: 31.4 +5.5                                                   | Ca: MRI / Rectal<br>USG / CA 125<br>Co:<br>Asymptomatic | Age, smoking                                                                                        | Cd                                           | Urine and blood                          |
| Heilier et al 2006 / [45]  | Belgium   | Case control             | 81 / 25                                                        | Ca:<br>ENDO: 31.5 +6.5<br>DEN: 29.3 +6.8<br>BD: 29.4 +4.8<br>Co: 30.5 +5.6                                | Ca: Sur<br>Co: Vaginal<br>echography and<br>CA 125      | Smoking                                                                                             | Cd, Pb                                       | Urine and blood                          |
| Pauwels et al 2001 / [71]  | Belgium   | Case control             | 42 / 27                                                        | Ca: 25-42 years<br>Co: 24-41 years                                                                        | Ca: Sur<br>Co: Sur                                      | Age, BMI, smoking status, alcohol consumption, caffeine intake and ovulatory dysfunction            | Dioxins, DL Co-planar PCB, Non-Co-planar PCB | Blood                                    |
| Niskar et al 2009 / [70]   | USA       | Case control             | 60 / 64                                                        | 20-45 years                                                                                               | Ca: Sur<br>Co: 48% by Sur                               | Lipid                                                                                               | PCDD, PCDF, PCB, p,p'-DDE                    | Blood                                    |
| Martinez et al 2015 / [66] | Spain     | Case control             | 30 / 30                                                        | Ca: 32.5 +3.8<br>Co: 31.1 +4.9                                                                            | Ca: Sur<br>Co: Sur                                      | Age, smoking and BMI.                                                                               | PCDD, PCDF, PCB                              | Adipose tissue                           |
| Simsa et al 2010 / [68]    | Belgium   | Case Control             | 96 / 105                                                       | Ca: 24 - 42 years<br>Co: 20 - 46 years                                                                    | Ca: Sur<br>Co: Sur                                      | Age                                                                                                 | DLC                                          | Blood                                    |

[N: number of participants, Ca: cases, Co: controls, EN: endometriosis, LEI: leiomyoma, AD: adenomyosis, DIE: deep infiltrating endometriosis, DEN: deep endometriotic nodules, ENDO: peritoneal endometriosis, OvE: ovarian endometrioma, BD: Both deep endometriotic nodules (DEN) and peritoneal endometriosis (ENDO), Sur: surgery, MRI: magnetic resonance imaging, USG: ultrasonography, HP: histopathology]

|                              |                   |                    |                                                                |                                                                                                           |                                                       |                                                                   |                                            |                              |
|------------------------------|-------------------|--------------------|----------------------------------------------------------------|-----------------------------------------------------------------------------------------------------------|-------------------------------------------------------|-------------------------------------------------------------------|--------------------------------------------|------------------------------|
| Heilier et al 2005 / [65]    | Belgium           | Case control       | 50 / 21                                                        | Ca:<br>ENDO: 31.8 +6.5<br>DEN: 30.8 +7.0<br>Co: 31.1 +6.0                                                 | Ca: Sur, HP, MRI<br>Co: Vaginal echography and CA 125 | Age, BMI                                                          | PCDD, PCDF, DL-PCB                         | Blood                        |
| Cai et al 2011 / [64]        | Japan             | Pilot case control | 10 / 7                                                         | Ca: 33.5 +3.6<br>Co: 36.4 +5.9                                                                            | Ca: Sur<br>Co: Sur                                    | Age, parity, smoking and BMI                                      | PCDD, PCDF, PCB                            | Serum and peritoneal fluid   |
| De Felip et al 2004 / [69]   | Belgium and Italy | Pilot case control | 23 / 17                                                        | 18- 40 years                                                                                              | Ca: Sur<br>Co: Sur                                    | Parity and diet                                                   | PCDD, PCDF, PCB                            | Blood                        |
| Ploteau et al 2017 / [67]    | France            | Case control       | 55 / 44                                                        | Ca:<br>DIE only: 32.7 +6.4<br>DIE+OvE: 36.7 +4.7<br>Co: 32.7 +6.4                                         | Ca: Sur<br>Co: Asymptomatic                           | Age and BMI                                                       | PBDE, PBB, PCDD, DL-PCB, NDL-PCB, OCP      | Serum and adipose tissue     |
| Lebel et al 1998 / [82]      | Canada            | Case control       | 86 / 70                                                        | Ca: 32.2 +5.9<br>Co: 33.2 +7.0                                                                            | Ca: Sur<br>Co: Sur                                    | Age, BMI, parity and indication for laparoscopy                   | PCB, OCP                                   | Blood                        |
| Porpora et al 2009 / [72]    | Italy             | Case control       | 80 / 78                                                        | Ca: 31.6 +6.0<br>Co: 29.5 +6.1                                                                            | Ca: Sur<br>Co: Sur                                    | Age, BMI, smoking habits and weight loss                          | HCB, p,p'-DDE, PCDD, PCDF, DL-PCB, NDL-PCB | Blood                        |
| Buck Louis et al 2012 / [59] | USA               | Matched cohort     | Operative Cohort<br>190 / 283<br>Population Cohort<br>14 / 113 | Operative Cohort<br>Ca: 32.0 +6.8<br>Co: 33.6 +7.1<br>Population Cohort<br>Ca: 33.1 +8.3<br>Co: 32.1 +7.8 | Operative Cohort: Sur<br>Population Cohort: MRI       | Age, BMI, breastfeeding, serum cotinine, lipid                    | PCB, PBDE, HCB, HCH, beta-HCH, gamma-HCH   | Blood, urine and omental fat |
| Cooney et al 2010 / [88]     | USA               | Cohort             | 29 / 51                                                        | Ca: 32 +4<br>Co: 31 +5                                                                                    | Ca: Sur<br>Co: Not explicitly stated                  | Lipid and smoking                                                 | OCP                                        | Blood                        |
| Louis et al 2005 / [79]      | USA               | Cohort             | 32 / 54                                                        | Ca: 32.7 +4.44<br>Co: 31.6 +4.96                                                                          | Ca: Sur<br>Co: Sur                                    | Gravidity, parity, current smoking status and serum lipids        | PCB                                        | Blood                        |
| Trabert et al 2010 / [81]    | USA               | Case control       | 251 / 538                                                      | 18-49 years                                                                                               | Ca: Sur<br>Co: Asymptomatic                           | Alcohol intake, income, age, lipid and quartile of serum p-p'-DDE | PCB                                        | Blood                        |
| Porpora et al 2006 / [80]    | Italy             | Case control       | 40 / 40                                                        | 22 – 40 years                                                                                             | Ca: Sur<br>Co: Sur                                    | Age and smoking.                                                  | PCB                                        | Blood                        |

[N: number of participants, Ca: cases, Co: controls, EN: endometriosis, LEI: leiomyoma, AD: adenomyosis, DIE: deep infiltrating endometriosis, DEN: deep endometriotic nodules, ENDO: peritoneal endometriosis, OvE: ovarian endometrioma, BD: Both deep endometriotic nodules (DEN) and peritoneal endometriosis (ENDO), Sur: surgery, MRI: magnetic resonance imaging, USG: ultrasonography, HP: histopathology]

**Table 8: Results showing the effect estimates for urinary **bisphenol-A** (BPA) and endometriosis**

| Author and Reference          | Effect Estimate                                                                                                                                                                                                                                                                    |                                                            |
|-------------------------------|------------------------------------------------------------------------------------------------------------------------------------------------------------------------------------------------------------------------------------------------------------------------------------|------------------------------------------------------------|
| Upson et al, 2014 / [13]      | Total BPA in microgram / L                                                                                                                                                                                                                                                         | OR <sup>a</sup> for NPE <sup>b</sup> / 95% CI <sup>c</sup> |
|                               | <= 0.364                                                                                                                                                                                                                                                                           | 1.0                                                        |
|                               | >0.364 – 0.863                                                                                                                                                                                                                                                                     | 3.3 (1.3, 8.3)                                             |
|                               | >0.863 – 2.01                                                                                                                                                                                                                                                                      | 2.9 (1.1, 7.6)                                             |
|                               | >2.01                                                                                                                                                                                                                                                                              | 1.7 (0.6, 1.1)                                             |
| Buck Louis et al, 2013 / [21] | OR for operative cohort 0.96 95% CI (0.79, 1.19) OR for population cohort 1.68 95% CI (0.96, 2.92)                                                                                                                                                                                 |                                                            |
| Rashidi et al, 2017 / [19]    | OR = 1.74 (95% CI 1.40 -2.16) P <0.001                                                                                                                                                                                                                                             |                                                            |
| Simonelli et al, 2016 / [20]  | The relationship between endometriosis and the expected occupational exposure shows statistically significant dependence ( $\chi^2 = 6.830$ , $p = 0.01$ ) and an OR of 0.38 (95 % CI, 95 % CI 0.18–0.79), with a higher percentage of patients in the unexpected exposed workers. |                                                            |

Key: a = odds ratio, b = Non-ovarian pelvic endometriosis, c = 95% confidence interval

**Table 9: Results showing the effect estimates for **phthalate esters** (PEs) and endometriosis**

| Author and Reference          | Effect Estimate                                                                                                                                                     |
|-------------------------------|---------------------------------------------------------------------------------------------------------------------------------------------------------------------|
| Buck Louis et al, 2013 / [21] | <b>Limit of quantitation measured in ng/mL</b>                                                                                                                      |
|                               | mBP<br>(Operative cohort)- OR <sup>a</sup> = 1.11 95% CI <sup>b</sup> (0.86, 1.43)<br>(Population cohort)- OR = 2.62 95% CI (1.14, 6.05)                            |
|                               | mCMHP<br>(Operative cohort)- OR = 0.98 95% CI (0.77, 1.26)<br>(Population cohort)- OR = 2.65 95% CI (1.33, 5.31)                                                    |
|                               | mOP<br>(Operative cohort)- OR = 1.06 95% CI (0.87, 1.29). Sensitivity analysis OR = 1.38 95% CI (1.10, 1.72)<br>(Population cohort)- OR = 0.84 95% CI (0.40, 1.78)  |
|                               | mEHP<br>(Operative cohort)- OR = 1.20 95% CI (0.97, 1.49). Sensitivity analysis OR = 1.35 95% CI (1.03, 1.78)<br>(Population cohort)- OR = 2.59 95% CI (1.17, 5.75) |
|                               | Sum of DEHP metabolites OR = 2.81 95% CI (1.42, 5.56)                                                                                                               |
|                               | <b>Phthalate ester quartiles in ng/mL</b>                                                                                                                           |
|                               | <b>Sum of DEHP P = 0.053</b>                                                                                                                                        |
| Upson K et al, 2013 / [31]    | <= 0.06 OR = 1.0                                                                                                                                                    |
|                               | >0.06-0.18 OR = 1.1 95% CI (0.5, 2.5)                                                                                                                               |
|                               | >0.18-0.50 OR = 0.7 95% CI (0.3, 1.8)                                                                                                                               |
|                               | >0.50 OR = 0.4 95% CI (0.1, 1.13)                                                                                                                                   |
|                               | <b>Sum of BzBP P = 0.559</b>                                                                                                                                        |
|                               | <= 0.03 OR = 1.0                                                                                                                                                    |
|                               | >0.03 – 0.07 OR = 1.7 95% CI (0.7, 4.2)                                                                                                                             |
|                               | >0.07- 0.16 OR = 0.9 95% CI (0.3, 2.8)                                                                                                                              |
|                               | >0.16 OR = 1.2 95% CI (0.3, 4.2)                                                                                                                                    |
|                               | <b>Sum of DBP P = 0.986:</b>                                                                                                                                        |
|                               | <= 0.03 OR = 1.0                                                                                                                                                    |
|                               | >0.03 – 0.06 OR = 1.3 95% CI (0.5, 3.1)                                                                                                                             |
|                               | >0.06 – 0.12 OR = 1.3 95% CI (0.5, 3.5)                                                                                                                             |
|                               | >0.12 OR = 1.3 95% CI (0.4, 4.3)                                                                                                                                    |
|                               | <b>MEHP OR = 0.3 95% CI (0.1, 0.7) P=0.012</b>                                                                                                                      |

|                           |                                                                                                                                                                                                                                                                         |
|---------------------------|-------------------------------------------------------------------------------------------------------------------------------------------------------------------------------------------------------------------------------------------------------------------------|
| Rosati et al, 2008 / [30] | Mean in micrograms/ml (SD), Control vs cases t-value; p-value:                                                                                                                                                                                                          |
|                           | DMP:<br>Cases: 0.03 (0.72), Controls: 0.04 (0.10), t: 5.13; p <0.0001                                                                                                                                                                                                   |
|                           | DEP:<br>Cases: 0.89 (0.84), Controls: 0.9 (0.18), t: 5.13; p <0.0001                                                                                                                                                                                                    |
|                           | DnBP:<br>Cases: 0.98 (0.96), Controls: 0.55 (0.89), t: -9.52; p <0.0001                                                                                                                                                                                                 |
|                           | BBP:<br>Cases: 3.32 (2.17), Controls: 0.15 (0.21), t: 5.22; p <0.0001                                                                                                                                                                                                   |
|                           | DEHP:<br>Cases: 2.15 (1.99), Controls: 0.11 (0.22), t: 0.33; p=0.0014                                                                                                                                                                                                   |
|                           | The correlation between PEs concentration (control group) and endometriosis different severity was strong and significant:<br>DMP: r=+0.03, p<0.0001; DnBP r=+0.39, p<0.0001;<br>BBP: r=+0.89, p<0.0001; DnOP: r=+0.66, p<0.0001<br>and BEHP: r=+0.33, p<0.0014         |
| Reddy et al, 2006 / [29]  | Mean in micrograms/ml (SD), Control vs cases t-value; p-value:                                                                                                                                                                                                          |
|                           | DnBP:<br>Cases: 0.44 (0.41), Controls I: 0.08 (0.14), Control II: 0.15 (0.21),<br>t (Control I vs cases): 5.13; p <0.0001, t (Control II vs cases): 3.01, p=0.004                                                                                                       |
|                           | BBP:<br>Cases: 0.66 (0.61), Controls I: 0.12 (0.20), Control II: 0.11 (0.22),<br>t (Control I vs cases): 5.13; p <0.0001, t (Control II vs cases): 3.94, p=0.0002                                                                                                       |
|                           | DnOP:<br>Cases: 3.32 (2.17), Controls I: 0, Control II: 0,                                                                                                                                                                                                              |
|                           | DEHP:<br>Cases: 2.44 (2.17), Controls I: 0.50 (0.80), Control II: 0.45 (0.68),<br>t (Control I vs cases): 5.22, p<0.0001, t (Control II vs cases): 4.10, p=0.0001                                                                                                       |
|                           | The correlation between PEs concentration (control group) and endometriosis different severity was strong and significant:<br>DnBP = r = +0.73; P <0.0001, BBP = r = +0.78; P <0.0001, DnOP = r = +0.73; P <0.000, DEHP = r = +0.44 P <0.0014                           |
| Kim et al, 2011 / [32]    | Mean concentrations in plasma in ng / mL                                                                                                                                                                                                                                |
|                           | 1. DEHP: Cases: 179.7 Controls: 92.5 OR = 1.001 95% CI (1.000, 1.002) P= 0.161<br>2. MEPH: Cases: 17.4 Controls: 12.4 OR =1.020 95% CI (1.003, 1.038) P=0.020                                                                                                           |
| Huang et al, 2010 / [28]  | Patients with GSTM1 null genotype increased risk for AD <sup>c</sup> (OR ¼ 10.4; 95% CI, 1.26–85.0) and LEI <sup>d</sup> (OR ¼ 5.93; 95% CI, 1.10–31.9) after adjustment for age, compared with those with GSTM1 <sup>e</sup> wild-type and low urinary level of SMEHP. |

Key: a = odds ratio, b = 95% CI = 95% confidence interval, c = Adenomyosis, d = Leiomyoma, e = Glutathione S-transferase M1

**Table 10: Results showing the effect estimates for metals and endometriosis**

| Author and Reference       | Effect Estimate                                                                                                                                                                                                                                                                                                                                    |
|----------------------------|----------------------------------------------------------------------------------------------------------------------------------------------------------------------------------------------------------------------------------------------------------------------------------------------------------------------------------------------------|
| Pollack et al, 2013 / [38] | Blood Cd:<br>(Operative cohort)- OR <sup>a</sup> <sub>(3rd vs 1st tertile)</sub> = 0.55 95% CI <sup>b</sup> (0.31, 0.98) and OR <sub>(2nd vs 1st tertile)</sub> = 0.74 95% CI (0.46, 1.21)<br>(Population cohort)- OR <sub>(3rd vs 1st tertile)</sub> = 0.14 95% CI (0.01, 1.58) and OR <sub>(2nd vs 1st tertile)</sub> = 1.73 95% CI (0.45, 6.67) |
|                            | Urinary Cd <sup>c</sup> :<br>(Operative cohort)- OR <sub>(3rd vs 1st tertile)</sub> = 0.74 95% CI (0.38, 1.43) and OR <sub>(2nd vs 1st tertile)</sub> = 1.19 95% CI (0.70, 2.02)<br>(Population cohort)- OR <sub>(3rd vs 1st tertile)</sub> = 0.22 95% CI (0.01, 4.13) and OR <sub>(2nd vs 1st tertile)</sub> = 1.18 95% CI (0.20, 7.17)           |
|                            | Blood Cr: NA <sup>d</sup>                                                                                                                                                                                                                                                                                                                          |
|                            |                                                                                                                                                                                                                                                                                                                                                    |

|                            |                                                                                                                                                                                                                                                                                                                                                                                                                                                                                                                                                                                                                                                                          |
|----------------------------|--------------------------------------------------------------------------------------------------------------------------------------------------------------------------------------------------------------------------------------------------------------------------------------------------------------------------------------------------------------------------------------------------------------------------------------------------------------------------------------------------------------------------------------------------------------------------------------------------------------------------------------------------------------------------|
|                            | Urinary Cr <sup>e</sup> :<br>(Operative cohort)- OR <sub>(3rd vs 1st tertile)</sub> = 0.91 95% CI (0.55, 1.51) and OR <sub>(2nd vs 1st tertile)</sub> = 1.97 95% CI (1.21, 3.19)<br>(Population cohort)- OR <sub>(3rd vs 1st tertile)</sub> = 1.29 95% CI (0.27, 6.23) and OR <sub>(2nd vs 1st tertile)</sub> = 0.94 95% CI (0.20, 4.44)                                                                                                                                                                                                                                                                                                                                 |
|                            | Blood Cu: NA<br>Urinary Cu <sup>f</sup> :<br>(Operative cohort)- OR <sub>(3rd vs 1st tertile)</sub> = 2.66 95% CI (1.26, 5.64) and OR <sub>(2nd vs 1st tertile)</sub> = 1.30 95% CI (0.76, 2.25)<br>(Population cohort)- OR <sub>(3rd vs 1st tertile)</sub> = 1.59 95% CI (0.13, 19.1) and OR <sub>(2nd vs 1st tertile)</sub> = 1.59 95% CI (0.31, 8.14)                                                                                                                                                                                                                                                                                                                 |
|                            | Blood Pb <sup>g</sup> :<br>(Operative cohort)- OR <sub>(3rd vs 1st tertile)</sub> = 0.84 95% CI (0.50, 1.41) and OR <sub>(2nd vs 1st tertile)</sub> = 0.73 95% CI (0.45, 1.17)<br>(Population cohort)- OR <sub>(3rd vs 1st tertile)</sub> = 1.70 95% CI (0.39, 7.38) and OR <sub>(2nd vs 1st tertile)</sub> = 0.92 95% CI (0.20, 4.16)                                                                                                                                                                                                                                                                                                                                   |
|                            | Urinary Pb:<br>(Operative cohort)- OR <sub>(3rd vs 1st tertile)</sub> = 1.36 95% CI (0.80, 2.31) and OR <sub>(2nd vs 1st tertile)</sub> = 1.33 95% CI (0.80, 2.21)<br>(Population cohort)- OR <sub>(3rd vs 1st tertile)</sub> = 1.94 95% CI (0.35, 10.7) and OR <sub>(2nd vs 1st tertile)</sub> = 1.32 95% CI (0.29, 6.09)                                                                                                                                                                                                                                                                                                                                               |
|                            | Blood Hg <sup>h</sup> :<br>(Operative cohort)- OR <sub>(3rd vs 1st tertile)</sub> = 1.00 95% CI (0.60, 1.67) and OR <sub>(2nd vs 1st tertile)</sub> = 1.08 95% CI (0.67, 1.74)<br>(Population cohort)- OR <sub>(3rd vs 1st tertile)</sub> = 0.81 95% CI (0.19, 3.39) and OR <sub>(2nd vs 1st tertile)</sub> = 0.69 95% CI (0.16, 2.90)<br><br>Urinary Hg:<br>(Operative cohort)- OR <sub>(3rd vs 1st tertile)</sub> = 0.78 95% CI (0.45, 1.36) and OR <sub>(2nd vs 1st tertile)</sub> = 1.00 95% CI (0.60, 1.65)<br>(Population cohort)- OR <sub>(3rd vs 1st tertile)</sub> = 0.14 95% CI (0.01, 1.52) and OR <sub>(2nd vs 1st tertile)</sub> = 0.19 95% CI (0.02, 1.87) |
| Silva et al, 2013 / [40]   | Whole blood concentrations in Geometric Means and 95% CI; <b>unit of measurement: micrograms/L</b> (Cases)                                                                                                                                                                                                                                                                                                                                                                                                                                                                                                                                                               |
|                            | Ni: 26 95% CI (1.9, 3.3) P = 0.016                                                                                                                                                                                                                                                                                                                                                                                                                                                                                                                                                                                                                                       |
|                            | Pb: 11.0 95% CI (8.6, 13.1) P = 0.389                                                                                                                                                                                                                                                                                                                                                                                                                                                                                                                                                                                                                                    |
|                            | Cd: 0.7 95% CI (0.7, 0.9) P = 0.423                                                                                                                                                                                                                                                                                                                                                                                                                                                                                                                                                                                                                                      |
|                            | Whole blood concentrations in Geometric Means and 95% CI; <b>unit of measurement: micrograms/L</b> (Controls):                                                                                                                                                                                                                                                                                                                                                                                                                                                                                                                                                           |
|                            | Ni: 0.8 95% CI (0.7, 0.9) P = 0.016                                                                                                                                                                                                                                                                                                                                                                                                                                                                                                                                                                                                                                      |
|                            | Pb: 6.9 95% CI (5.7, 8.0) P = 0.389                                                                                                                                                                                                                                                                                                                                                                                                                                                                                                                                                                                                                                      |
|                            | Cd: 0.8 95% CI (0.6, 1.0) P = 0.423                                                                                                                                                                                                                                                                                                                                                                                                                                                                                                                                                                                                                                      |
| Itoh et al, 2008 / [47]    | Urinary Cd concentration tertile cut-off points: P for trend – 0.79                                                                                                                                                                                                                                                                                                                                                                                                                                                                                                                                                                                                      |
|                            | 0.184 – 0.389 OR = 1.00 (Referent)                                                                                                                                                                                                                                                                                                                                                                                                                                                                                                                                                                                                                                       |
|                            | 0.393 – 0.699 OR = 1.69 95% CI (0.64, 4.44)                                                                                                                                                                                                                                                                                                                                                                                                                                                                                                                                                                                                                              |
|                            | 0.707 – 7.92 OR = 0.86 95% CI (0.30, 2.49)                                                                                                                                                                                                                                                                                                                                                                                                                                                                                                                                                                                                                               |
| Heilier et al, 2004 / [46] | Geometric Means of Cd concentration in urine in micrograms / gram of creatinine (geometric SD), p-value:                                                                                                                                                                                                                                                                                                                                                                                                                                                                                                                                                                 |
|                            | PE <sup>j</sup> : 0.25 (1.50), DEN <sup>k</sup> : 0.29 (1.76), Controls: 0.26 (1.46), p-value not given, however the author stated that no significant difference in means                                                                                                                                                                                                                                                                                                                                                                                                                                                                                               |
|                            | Geometric Means of Cd concentration in blood in micrograms / litre of blood (geometric SD):                                                                                                                                                                                                                                                                                                                                                                                                                                                                                                                                                                              |
|                            | PE: 0.1 (1.5), DEN: 0.1 (1.4), Controls 0.1 (1.6), P = 0.80                                                                                                                                                                                                                                                                                                                                                                                                                                                                                                                                                                                                              |
| Heilier et al, 2006 / [45] | Blood concentrations in micrograms / litre, and urine concentration in micrograms / gram creatinine are presented below as geometric means (geometric SD):                                                                                                                                                                                                                                                                                                                                                                                                                                                                                                               |
|                            | Blood Pb: controls= 22 (1.5); cases= 17 (1.7)                                                                                                                                                                                                                                                                                                                                                                                                                                                                                                                                                                                                                            |
|                            | Blood Cd: controls= 0.4 (2.1); cases= 0.4 (1.9);                                                                                                                                                                                                                                                                                                                                                                                                                                                                                                                                                                                                                         |



|  |                                                                             |
|--|-----------------------------------------------------------------------------|
|  | Urinary Cd: controls= 0.3 (1.9); cases= 0.3 (2.3);                          |
|  | Analysis of variance: Pb (Blood) – 0.10; Cd (Blood)-0.51; Cd (Urine) – 0.78 |

Key: a = odds ratio, b = 95% confidence interval, c = Cadmium, d = Not available, e = Chromium, f = Copper, g = Lead, h = Mercury, i = Nickel, j = peritoneal endometriosis k = deep endometriotic nodule

**Table 11: Results showing the effect estimates dioxins, dioxin-like compounds (DLCs), non-dioxin like polychlorinated biphenyls (NDL-PCBs), polychlorinated biphenyls (PCBs), other persistent organochlorine pollutants (POPs) and endometriosis**

| Author and Reference        | Effect Estimate                                                                                                                                                                                                                                                                                                                                                                                                                                                                                                                                             |
|-----------------------------|-------------------------------------------------------------------------------------------------------------------------------------------------------------------------------------------------------------------------------------------------------------------------------------------------------------------------------------------------------------------------------------------------------------------------------------------------------------------------------------------------------------------------------------------------------------|
| Pauwels et al, 2001 / [71]  | CALUX based TEQ <sup>a</sup> values for dioxins and dioxin co-planar PCBs (median values)<br>Cases: 29 pg TEQ / g lipid; Controls: 27 pg TEQ / g lipid. OR <sup>b</sup> = 4.5 95% CI <sup>c</sup> (0.48, 43.62)                                                                                                                                                                                                                                                                                                                                             |
| Niskar et al, 2009 / [70]   | Lipid adjusted PCB OR = 1.04 95%CI (0.44, 2.44)<br>Non-Lipid adjusted PCB OR = 1.02 95%CI (0.43, 2.41)<br>Unadjusted TEQ OR = 1.02 95%CI (0.95, 1.08)                                                                                                                                                                                                                                                                                                                                                                                                       |
| Martinez et al, 2015 [66]   | Median concentration in adipose tissue in pg / gram lipid:<br>Dioxins + Furans:<br>Cases: 6.90 Controls: 6.10 OR = 1.72 95%CI 1.16-3.15 P<0.05<br>PCBs:<br>Cases: 4.64 Controls: 6.10 OR = 1.97 95%CI 1.36 - 2.77 P=0.01<br>TEQ values of 2,3,7,8-TCDD and 1,2,3,7,8-PeCDD and 2,3,4,7,8-PeCDF were also statistically significantly higher in cases than in controls (P<0.001 for each)                                                                                                                                                                    |
| Simsa et al, 2010 / [68]    | Endometriosis in women with higher exposure (>75 centile - > 25 pg CALUX TEQ/ g / lipid) versus women with lower exposure (<25 pg CALUX TEQ / g/ lipid):<br>OR = 2.44 (95%CI 1.05-5.70 P=0.04) in women with higher compared with lower DLC versus controls.<br>OR = 3.01 (95%CI 1.06 -9.04 P=0.03) in women with moderate to severe endometriosis with higher concentration of DLC as compared to women with lower concentration of DLC.                                                                                                                   |
| Heilier et al, 2005 / [65]  | Log Regression was significant for DEN <sup>d</sup> – OR = 3.3 95% CI (1.4, 7.6) for an increment of 10 pg in total TEQ levels / g lipid.<br>An increased risk was also found for PE <sup>e</sup> – OR = 1.9 95% CI (0.9, 3.8) for total TEQ levels and also for dioxins alone at OR 3.2 95% CI (1.0, 9.9)                                                                                                                                                                                                                                                  |
| Cai et al, 2011 / [64]      | OR =2.5 95%CI (1.17, 5.34)                                                                                                                                                                                                                                                                                                                                                                                                                                                                                                                                  |
| De Felip et al, 2004 / [69] | Analyte concentrations in pgTE/g lb (picogram Toxic Equivalent/gram of lipid base, based on WHO-Toxic Equivalent) in<br>Italian Cases:<br>PCDD+PCDF: 10 - 11<br>Non-ortho PCB: 3.9 - 4.0<br>Mono-ortho PCB: 3.8 - 4.3<br>Belgian Cases:<br>PCDD+PCDF: 18- 27<br>Non-ortho PCB: 8.6 - 11<br>Mono-ortho PCB: 7.7 - 11<br>Analyte concentrations in pgTE/g lb (picogram Toxic Equivalent/gram of lipid base, based on WHO-Toxic Equivalent) in<br>Italian Controls:<br>PCDD+PCDF: 8.9 +/- 1.3<br>Non-ortho PCB: 3.92 +/- 0.58<br>Mono-ortho PCB: 4.83 +/- 0.71 |

|                               |                                                                                                                                                                                                                                                                                                                                                                                                                                                                                                             |
|-------------------------------|-------------------------------------------------------------------------------------------------------------------------------------------------------------------------------------------------------------------------------------------------------------------------------------------------------------------------------------------------------------------------------------------------------------------------------------------------------------------------------------------------------------|
|                               | Belgian Controls:                                                                                                                                                                                                                                                                                                                                                                                                                                                                                           |
|                               | PCDD+PCDF: 24.7 +/- 3.7                                                                                                                                                                                                                                                                                                                                                                                                                                                                                     |
|                               | Non-ortho PCB: 9.4 +/- 1.4                                                                                                                                                                                                                                                                                                                                                                                                                                                                                  |
|                               | Mono-ortho PCB: 10.4 +/- 1.5                                                                                                                                                                                                                                                                                                                                                                                                                                                                                |
| Ploteau et al, 2017 / [67]    | 1. Association between the cases with DIE <sup>f</sup> + OvE <sup>g</sup> for PBB 153 showed aOR <sup>h</sup> (95% CI) of 8.26 (2.27–44.41) 1-SD increase<br>2. OCDF = adjusted ORs (95% CI) of 5.42 (2.73–12.85) per 1-SD increase                                                                                                                                                                                                                                                                         |
| Louis et al, 2005 / [79]      | Risk for anti-estrogenic PCB congeners and risk of endometriosis<br>OR = 3.30 95% CI (0.87, 12.46)                                                                                                                                                                                                                                                                                                                                                                                                          |
| Trabert et al, 2010 / [81]    | Sum of all PCB congeners: OR = 1.3 95% CI (0.8, 2.2)<br>Sum of Estrogenic congeners: OR = 1.1 95% CI (0.8, 1.4)                                                                                                                                                                                                                                                                                                                                                                                             |
| Porpora et al, 2006 / [80]    | Median concentration in ng / g lipid<br><b>All PCBs:</b><br>Cases: 410 Controls: 250 P = 0.0003<br>Categories: 250-360 OR = 6.5 95% CI (1.5, 28)<br>Categories: > 360 OR = 5.3 95% CI (1.3, 23)<br><b>PCB-153</b><br>Cases: 150 Controls: 95 P = 0.0004<br>Categories: 93-130 OR = 10.0 95% CI (2.1, 48)<br>Categories: > 130 OR = 9.1 95% CI (1.9, 43)<br><b>PCB-180</b><br>Cases: 65 Controls: 45 P = 0.0002<br>Categories: 37-64 OR = 5.8 95% CI (1.4, 24)<br>Categories: > 64 OR = 4.0 95% CI (1.0, 16) |
| Lebel et al, 1998 / [82]      | Geometric means in micrograms / kg lipid:<br><b>Sum of all PCB congeners:</b><br>Cases: 123.5 95% CI (113.3, 134.7) Controls: 119.3 95% CI (108.9, 130.5)                                                                                                                                                                                                                                                                                                                                                   |
| Porpora et al, 2009 / [72]    | <b>Total PCBs:</b><br>209-305: Cases: 41.25; Controls: 25.68 OR = 4.64 95% CI (1.93, 11.16)<br>≥306: Cases: 42.50; Controls: 22.90 OR = 5.63 95% CI (2.25, 14.70)                                                                                                                                                                                                                                                                                                                                           |
| Buck Louis et al, 2012 / [59] | PCB-74 in fat<br>(Operative cohort) – OR = 0.72 95% CI (0.55, 0.93)<br>(Population cohort)- NA as no fat available<br>PCB 156 in fat<br>(Operative cohort) – OR = 0.74 95% CI (0.57, 0.96)<br>(Population cohort)- NA as no fat available<br>PBDE - 47 in fat<br>(Operative cohort) – OR = 0.70 95% CI (0.55, 0.90)<br>(Population cohort)- NA as no fat available                                                                                                                                          |

Key: a = Toxic equivalency factor, b = odds ratio, c = 95% confidence interval, d = Deep endometriotic nodules, e = Peritoneal endometriosis, f = Deep Infiltrating Endometriosis, g = Ovarian Endometriosis, h = adjusted odds ratio

**Table 12: Results showing the effect estimates of organochlorinated pesticides (OCPs) and endometriosis**

| Author and Reference       | Effect Estimate                                                                                                                                                                                                                                                     |
|----------------------------|---------------------------------------------------------------------------------------------------------------------------------------------------------------------------------------------------------------------------------------------------------------------|
| Lebel et al, 1998 / [82]   | <b>Sum of all Chlordanes (pesticides) in Geometric Means</b><br>Cases: 22.4 95% CI <sup>a</sup> (20.9, 23.9) Controls: 22.3 95% CI (20.7, 24.1)<br><b>Sum of DDT in Geometric Means</b><br>Cases: 238.2 95% CI (209.8, 270.6) Controls: 229.0 95% CI (195.6, 268.1) |
| Porpora et al, 2009 / [72] | <b>HCB:</b><br>32-54 (concentration in ng/g fat): Cases: 35.0 Controls: 30.77; OR <sup>b</sup> = 0.91 95% CI (0.40, 2.08)                                                                                                                                           |

|                               |                                                                                                                                                                                                                      |
|-------------------------------|----------------------------------------------------------------------------------------------------------------------------------------------------------------------------------------------------------------------|
|                               | 32-54 (concentration in ng/g fat): Cases: 35.0 Controls: 30.77; OR <sup>b</sup> = 0.91 95%CI (0.40, 2.08)                                                                                                            |
|                               | <b>p-p'DDE:</b>                                                                                                                                                                                                      |
|                               | 32-54 (concentration in ng/g fat): Cases: 35.0 Controls: 30.77; OR <sup>b</sup> = 0.91 95%CI (0.40, 2.08)                                                                                                            |
|                               | 32-54 (concentration in ng/g fat): Cases: 35.0 Controls: 30.77; OR <sup>b</sup> = 0.91 95%CI (0.40, 2.08)                                                                                                            |
|                               | <b>pgC-TEQs/g fat:</b>                                                                                                                                                                                               |
|                               | 32-54 (concentration in ng/g fat): Cases: 35.0 Controls: 30.77; OR <sup>b</sup> = 0.91 95%CI (0.40, 2.08)                                                                                                            |
|                               | 32-54 (concentration in ng/g fat): Cases: 35.0 Controls: 30.77; OR <sup>b</sup> = 0.91 95%CI (0.40, 2.08)                                                                                                            |
| Niskar et al, 2009 / [70]     | P,P'-DDE Median concentrations (pgg-1), p-value for median test: cases=18900, controls=14600, p=0.15                                                                                                                 |
| Buck Louis et al, 2012 / [59] | Gamma HCH in fat<br>(Operative cohort) - OR = 1.27 95%CI (1.01, 1.59)<br>(Population cohort)- NA as no fat available                                                                                                 |
|                               | Beta HCH in serum<br>(Operative cohort) - OR = 0.77 95%CI (0.54, 1.14)<br>(Population cohort) - OR = 1.72 95%CI (1.09, 2.72)                                                                                         |
|                               |                                                                                                                                                                                                                      |
| Cooney et al, 2010 / [88]     | HCB OR = 6.4 95%CI (1.0, 42.8)                                                                                                                                                                                       |
|                               | t-nonachlor OR = 4.6 95%CI (0.5 , 41.6)                                                                                                                                                                              |
|                               | Aldrin OR = 1.2 95%CI (0.2, 8.1)                                                                                                                                                                                     |
|                               | Beta-BHC OR = 2.0 95%CI ( 0.3, 15.8)                                                                                                                                                                                 |
|                               | After grouping for structure – aromatic fungicides OR= 5.3 95%CI (1.2, 23.6) for highest tertile                                                                                                                     |
|                               | After grouping for structure – cyclodiene insecticide OR = 2.7 95%CI ( 0.8, 9.5)                                                                                                                                     |
|                               | After grouping for structure –chlorinated insecticide OR = 1.6 95%CI ( 0.5, 5.3) for mid-range tertile                                                                                                               |
| Ploteau et al, 2017 / [67]    | 1. Association between the cases with DIE <sup>c</sup> + OvE <sup>d</sup> for oxychlordane showed aOR (95%CI) of 5.82(1.84–27.69) for 1-SD increase<br>2. cis-heptachlor epoxide 5.36 (2.44–14.84) per 1-SD increase |

Key: a = 95% confidence interval, b = odds ratio, c = Deep Infiltrating Endometriosis, d = Ovarian Endometrioma
